# Supplementary material for: Phosphatidylinositol phosphate kinase PIPKIγ and phosphatase INPP5E coordinate initiation of ciliogenesis
Source: Nat Commun. 2016 Feb 26;7:10777. doi: 10.1038/ncomms10777 (PMC4773430; doi:10.1038/ncomms10777)
Supplement: Supplementary Information — Supplementary Figures 1-7 [file ncomms10777-s1.pdf]

# **Xu et al., Supplementary Figures 1-7**

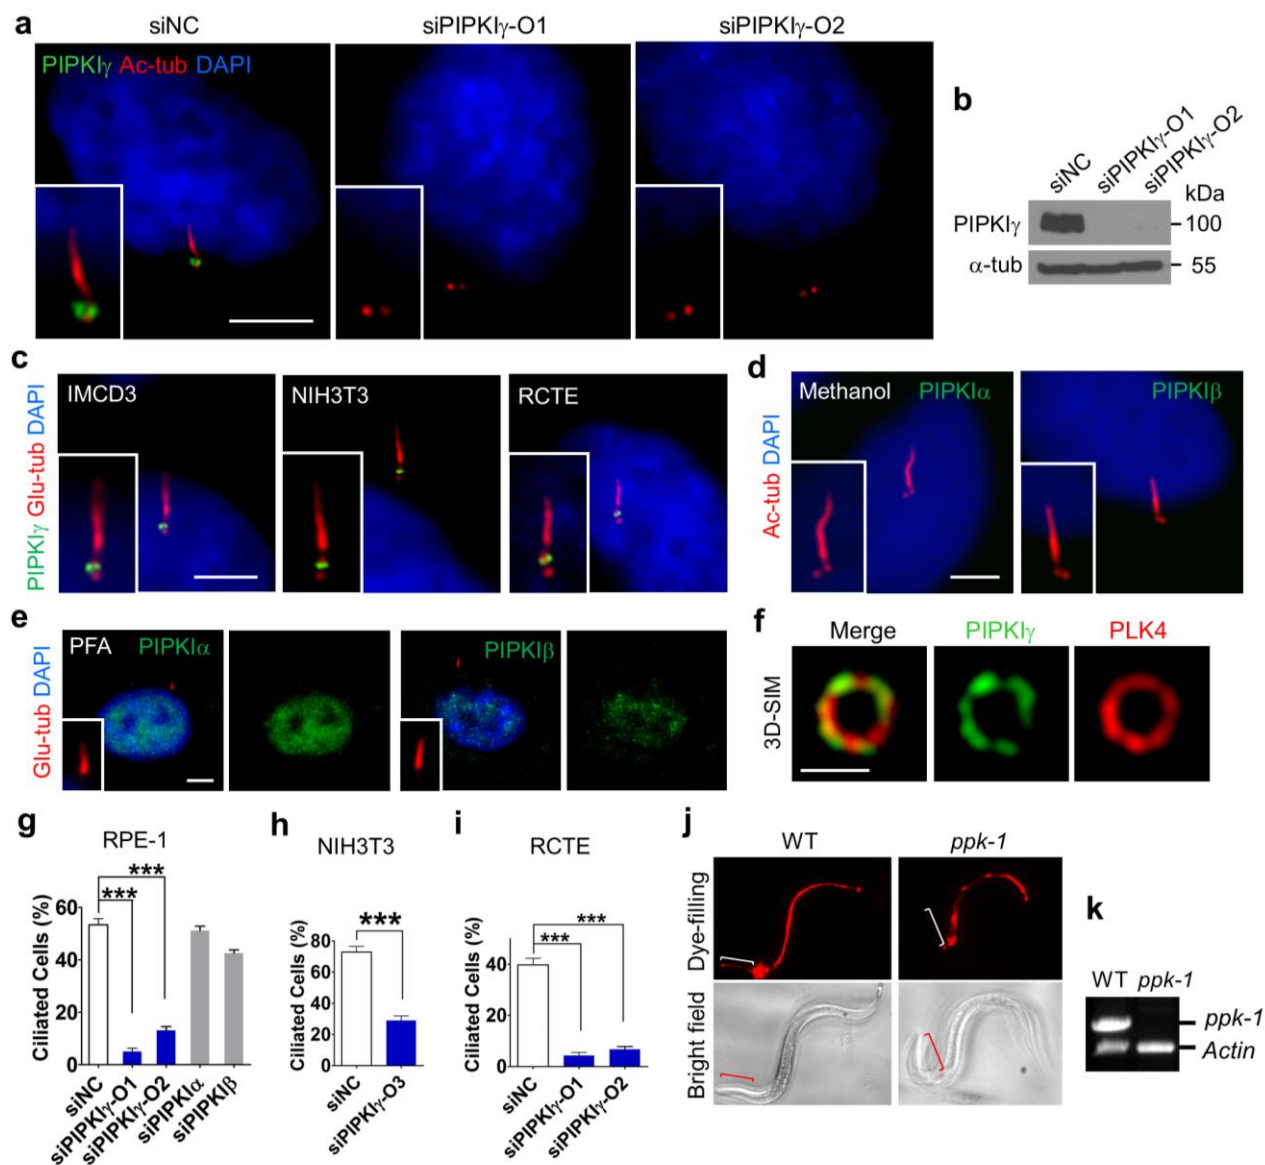

**Supplementary Figure 1. PIPKI $\gamma$  is required for ciliogenesis.** (a) PIPKI $\gamma$  localizes at the basal body of primary cilium. RPE-1 cells treated with two siRNAs targeting to human PIPKI $\gamma$  (siPIPKI $\gamma$ -O1, siPIPKI $\gamma$ -O2) or negative control siRNA (siNC) were serum starved to induce primary ciliogenesis and stained with appropriate antibodies. (b) Knockdown of PIPKI $\gamma$  was validated by immunoblotting. (c) PIPKI $\gamma$  exhibits basal body localization in multiple types of ciliated cells. (d, e) PIPKI $\alpha$  and PIPKI $\beta$  antibodies yielded no cilium-related signal. Serum starved RPE-1 cells were fixed with methanol (d) or

paraformaldehyde (PFA) (e) and stained with appropriate antibodies. (f) PIPKI $\gamma$  forms a ring-like structure at the ciliary base. RPE-1 cells co-stained with anti-PIPKI $\gamma$  and anti-PLK4 antibodies were examined by 3D-SIM microscopy. (g-i) PIPKI $\gamma$  depletion substantially inhibits primary ciliogenesis in RPE-1, NIH3T3, and RCTE cells. (g) RPE-1 cells treated with negative control (siNC) or siRNAs against PIPKI $\gamma$  (siPIPKI $\gamma$ -O1 and siPIPKI $\gamma$ -O2), PIPKI $\alpha$  (siPIPKI $\alpha$ ), or PIPKI $\beta$  (siPIPKI $\beta$ ) were serum starved to induce ciliogenesis and stained with anti-acetylated  $\alpha$ -tubulin antibody (Ac-tub). (h) NIH3T3 cells were treated with siNC or mouse PIPKI $\gamma$ -specific (siPIPKI $\gamma$ -O3) siRNAs. (i) RCTE cells treated with siNC or two PIPKI $\gamma$ -specific siRNAs were analyzed as described in (a). The percentage of ciliated cells ( $n > 200$ ) in each group was quantified from at least three independent experiments and plotted. Error bars represent s.d. \*\*\* $P < 0.001$ . (j) Severe ciliary defect was observed in *ppk-1*-null *C. elegans*. With dye-filling assay, *ppk-1*-null worms exhibited complete dye-filling minus phenotype. Brackets indicate ciliated Amphid neurons. (k) Genotyping results of *ppk-1*-null worms. *Actin* was used as a loading control. Nuclei were visualized by DAPI staining (blue). Insets show magnified images of primary cilia. Ac-tub, acetylated  $\alpha$ -tubulin. Glu-tub, polyglutamylated tubulin.  $\alpha$ -tub,  $\alpha$ -tubulin. Scale bars are 0.5  $\mu$ m in (f) and 5  $\mu$ m in other panels.

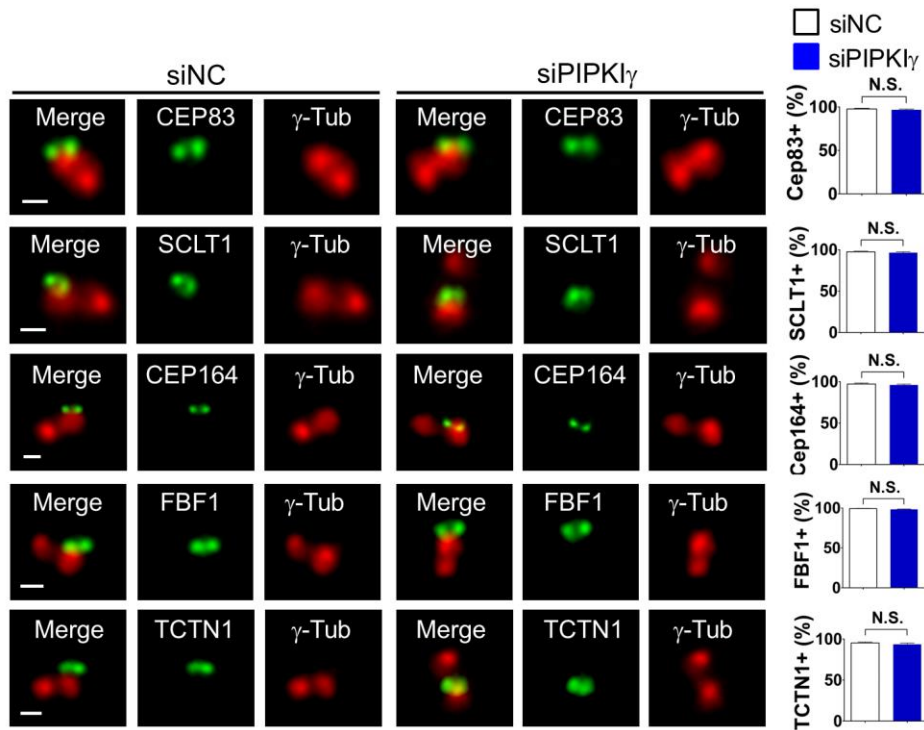

**Supplementary Figure 2. PIPKI $\gamma$  functions downstream of basal-body membrane docking and upstream of TZ formation.** RPE-1 cells treated with negative control (siNC) or PIPKI $\gamma$  (siPIPKI $\gamma$ ) siRNA were serum starved and stained with the appropriate antibodies. Percentage of cells ( $n > 200$ ) showing positive staining of indicated proteins was quantified from at least three experiments. Error bars represent standard deviation (s.d.). N.S., no statistically significant difference.  $\gamma$ -tub,  $\gamma$ -tubulin. Scale bars, 0.5  $\mu$ m.

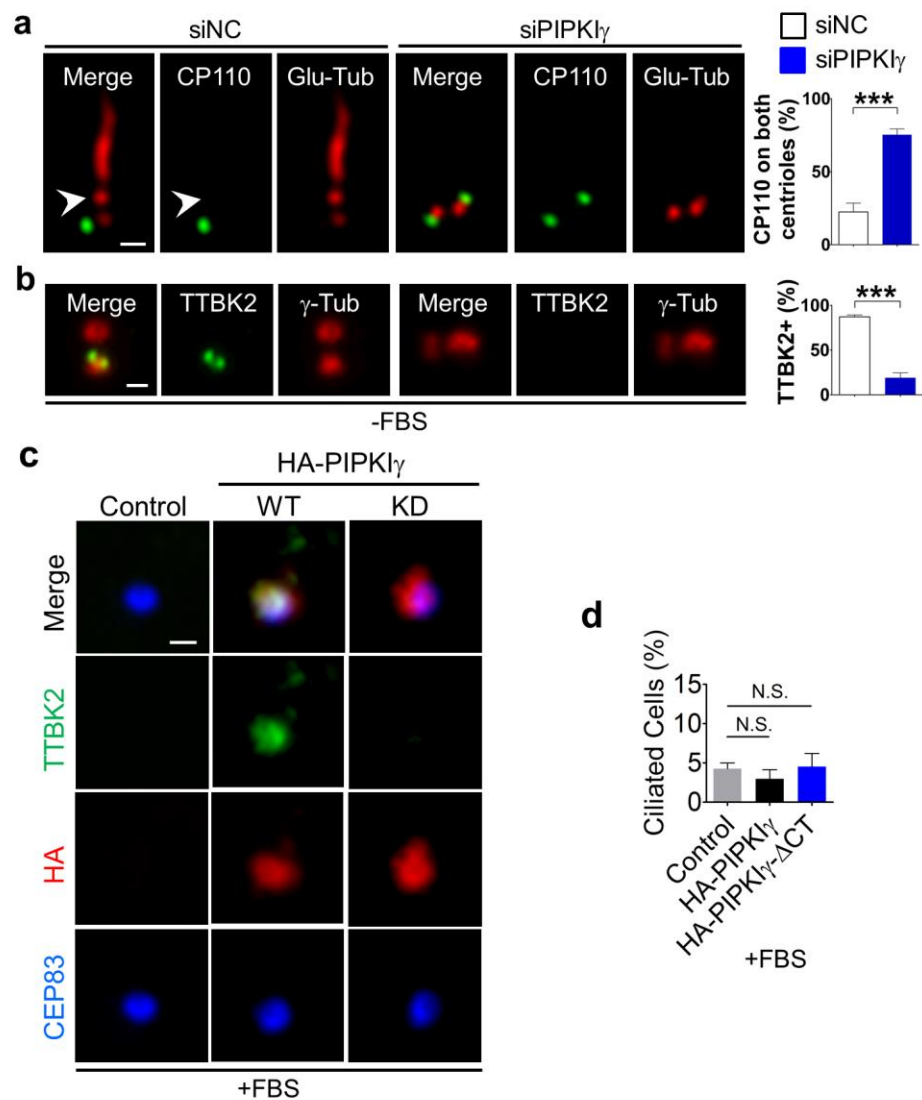

**Supplementary Figure 3. PIPKI $\gamma$  promotes the recruitment of TTBK2 to the M-centriole/basal body.** (a) CP110 retained at the M-centriole in serum-starved, PIPKI $\gamma$ -depleted RPE-1 cells. Arrowheads point to the basal body. (b) TTBK2 recruitment to the M-centriole induced by serum starvation was impaired in RPE-1 cells when PIPKI $\gamma$  was knocked down. Percentage of cells (n > 200) exhibiting CP110 on both centrioles (a), or TTBK2 at the M-centriole/basal body (b) was quantified from at least three independent experiments. Glu-tub, polyglutamylated tubulin.  $\gamma$ -tub,  $\gamma$ -tubulin. (c) PIPKI $\gamma$  overexpression promotes TTBK2 recruitment to the centrosome in a PIPKI $\gamma$  kinase activity dependent manner. RCTE cells stably expressing GFP-TTBK2 were transfected with empty vector

(Control), wild-type (WT), or kinase-dead (KD) HA-PIPKI $\gamma$ i3 for 8 h without serum starvation. Cep83 was used as a centrosome marker. **(d)** RCTE cells were transfected with empty vector (Control), HA-PIPKI $\gamma$ , and HA-PIPKI $\gamma$  $\Delta$ CT. The percentage of ciliated cells ( $n > 20$ ) in each group was quantified from at least three independent experiments and plotted. Error bars represent standard deviation (s.d.). \*\*\* $P < 0.001$ . N.S., no statistically significant difference. Scale bars, 0.5  $\mu$ m.

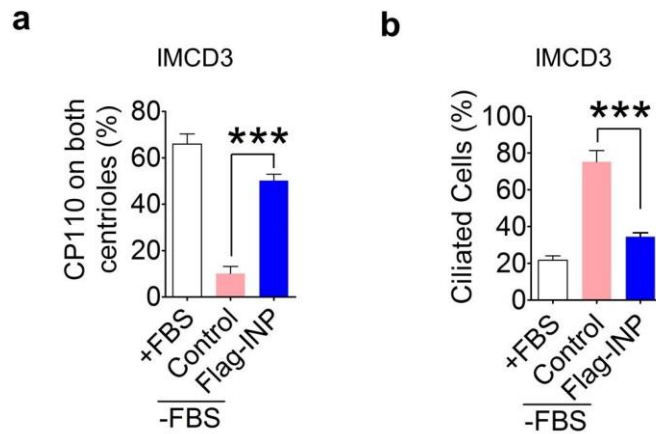

**Supplementary Figure 4. INPP5E inhibits ciliogenesis by suppressing CP110 removal from the basal body.** IMCD3 Cells transfected with empty vector (Control), or Flag-INPP5E were serum starved and stained with indicated antibodies. Percentage of cells with CP110 on both centrioles (**a**,  $n > 100$ ) and ciliated cells (**b**,  $n > 200$ ) was quantified from at least three independent experiments. Error bars represent s.d. \*\*\* $P < 0.001$ .

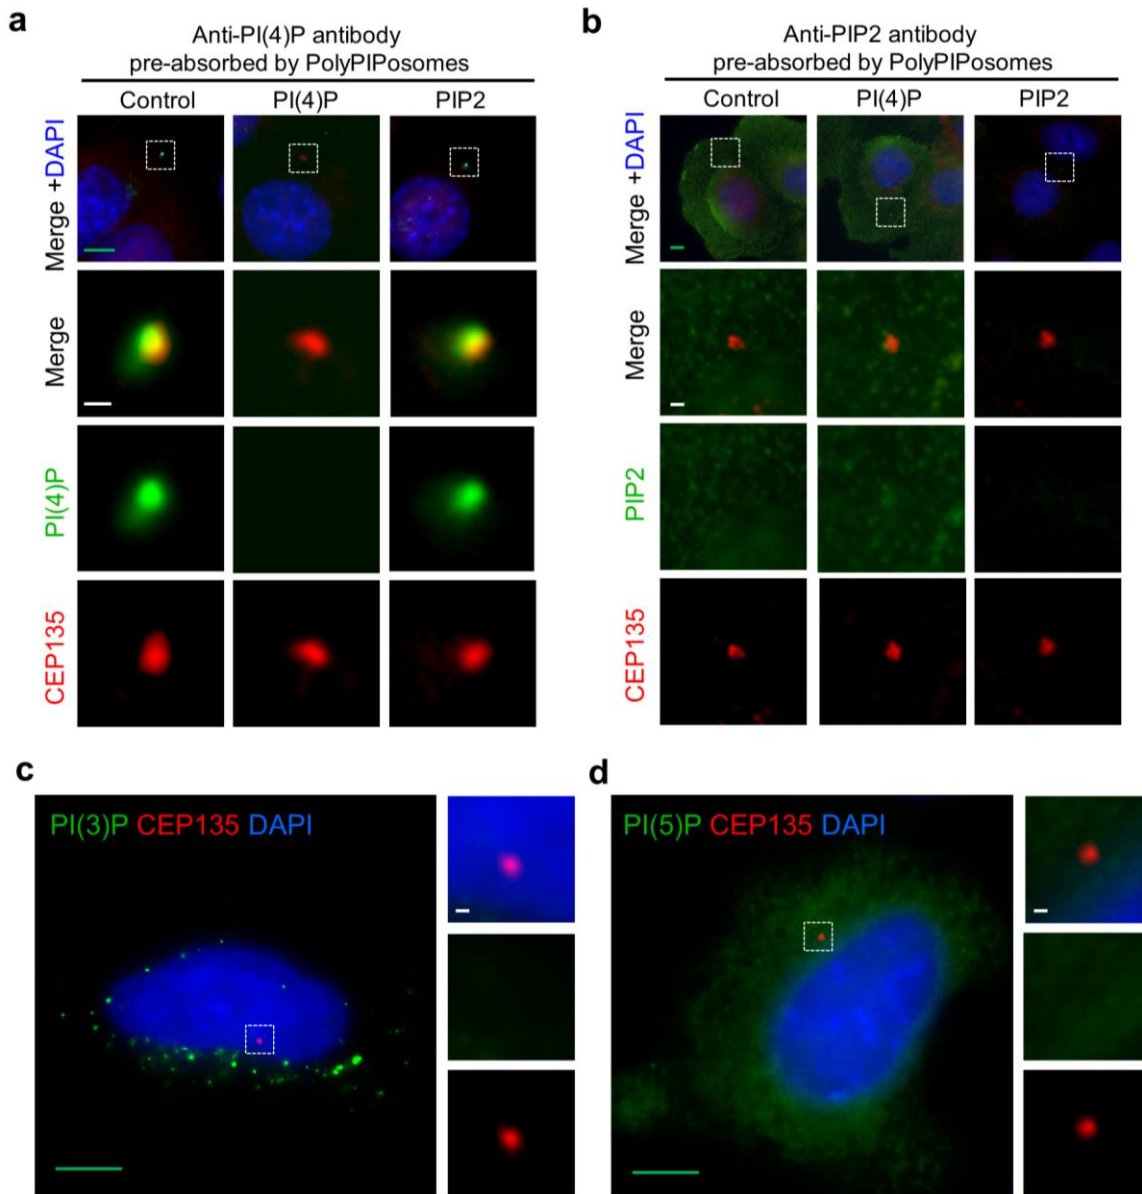

**Supplementary Figure 5. Localization of PI variants in cell.** (a, b) IMCD3 cells were stained with indicated antibodies, and nuclei were visualized by DAPI staining. Anti-PtdIns(4)P (PI(4)P) (a) and anti-PtdIns(4,5)P<sub>2</sub> (PIP2) (b) antibodies were pre-absorbed with control PolyPIPosomes (Control), or PolyPIPosomes containing 5% of PI(4)P or PIP2 before adding onto samples for immunostaining. (c, d) IMCD3 cells transfected with the PI(3)P probe GFP-FYVE, or the PI(5)P probe GFP-PHD were processed for immunofluorescence microscopy. Scale bars: green, 5  $\mu$ m; white, 0.5  $\mu$ m.



wild-type (WT) Myc-CEP164 or GFP-TTBK2, or mutated Myc-CEP164 (9A) and GFP-TTBK2 ( $\Delta$ PI) were subjected to pull-down assay with PolyPIPosomes containing PI(4)P. The resulting precipitates and cell lysates (Input) were immunoblotted with indicated antibodies.

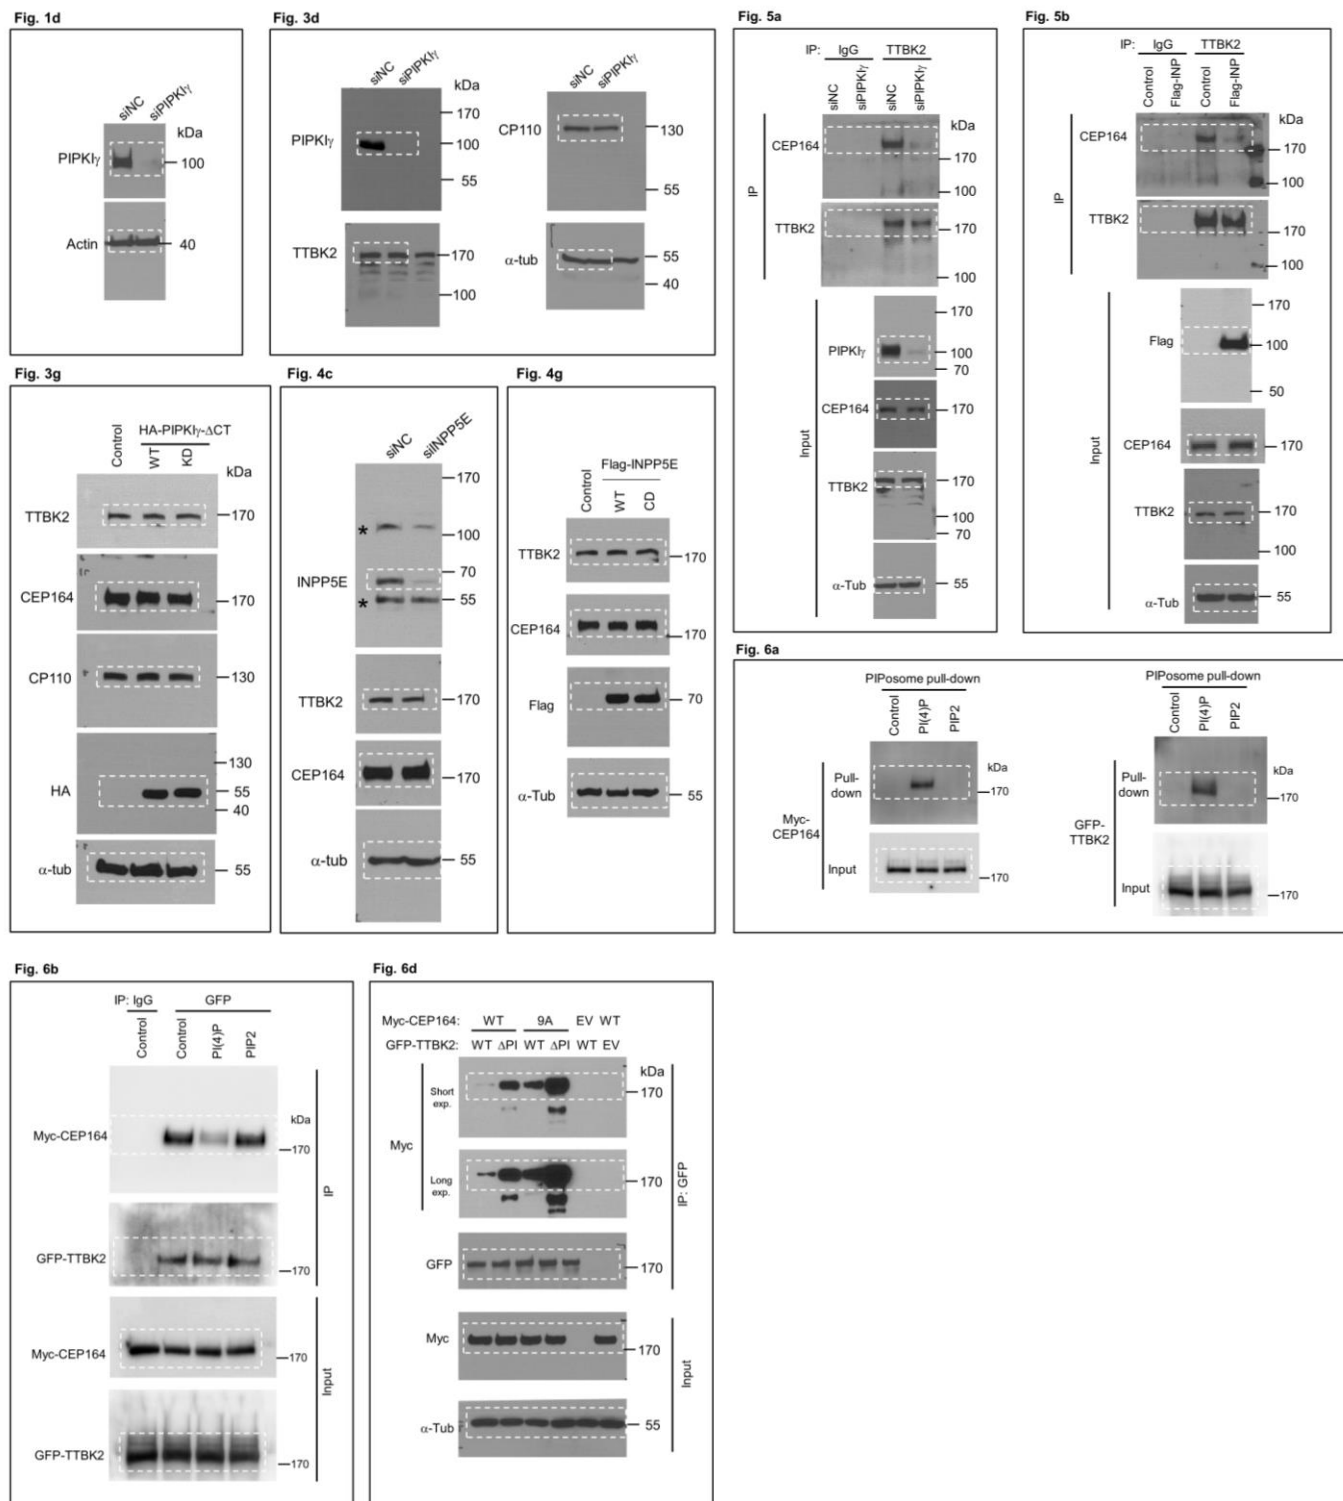

**Supplementary Figure 7. Uncropped images of immunoblotting results for Figs. 1-7.**
